# Supplementary material for: Structural engineering through modulator incorporation in UiO-66-NH2 metal–organic frameworks for piezoresponse regulation
Source: Royal Society of Chemistry journal article supplement (doi:10.1039/d4ta07509a), 2025-01-01
Supplement: d4ta07509a1.pdf [file d4ta07509a1.pdf]

## Supplementary Information

# **Structure Engineering through Modulator Incorporation in UiO-66-NH<sub>2</sub> Metal-Organic Frameworks for Piezoresponse Regulation**

Zhi Yu,<sup>a</sup> Dingqi Wang,<sup>a</sup> Tian Zheng,<sup>b</sup> Ali Zavabeti,<sup>a</sup> Yongqiang Wang,<sup>a</sup> Chao Wu,<sup>a</sup> Jianing Yang,<sup>a</sup> Yalou Guo,<sup>c</sup> Paul A. Webley,<sup>\*ac</sup> and Gang Kevin Li <sup>\*a</sup>

<sup>a</sup> Department of Chemical Engineering, The University of Melbourne, Parkville, Melbourne, VIC 3010, Australia

E-mail: [li.g@unimelb.edu.au](mailto:li.g@unimelb.edu.au)

<sup>b</sup> Materials Characterisation and Fabrication Platform, Department of Chemical Engineering, The University of Melbourne, Parkville, Melbourne, VIC 3010, Australia

<sup>c</sup> Department of Chemical and Biological Engineering, Monash University, Clayton, VIC 3800, Australia

E-mail: [paul.webley@monash.edu](mailto:paul.webley@monash.edu)

## 1. Supplementary Text

### Experimental Chemical Formula Calculation through TGA and NMR

To quantitatively acquire the experimental dehydrated chemical formula of UiO-66-NH<sub>2</sub> (Zr, Hf) with different modulators, the details are discussed below, followed by a reported work<sup>1</sup>.

First, the theoretical dehydrated chemical formula of UiO-66-NH<sub>2</sub> (Hf) is Hf<sub>6</sub>O<sub>6</sub>(BDC-NH<sub>2</sub>)<sub>6</sub>. Then, it undergoes the reaction through a heating process as follows: Hf<sub>6</sub>O<sub>6</sub>(BDC-NH<sub>2</sub>)<sub>6</sub> (s) + O<sub>2</sub> (g) → HfO<sub>2</sub> (s) + CO<sub>2</sub> (g) + NO<sub>2</sub> (g) + H<sub>2</sub>O (g), where the only remaining solid is HfO<sub>2</sub>. As 1 mol Hf<sub>6</sub>O<sub>6</sub>(BDC-NH<sub>2</sub>)<sub>6</sub> produces 6 mol HfO<sub>2</sub> and the molar weight of Hf<sub>6</sub>O<sub>6</sub>(BDC-NH<sub>2</sub>)<sub>6</sub> and HfO<sub>2</sub> are 2241.84 g/mol and 210.49 g/mol, the normalized weight of Hf<sub>6</sub>O<sub>6</sub>(BDC-NH<sub>2</sub>)<sub>6</sub> can be calculated as 2241.84 / (6×210.49) ≈ 177.5% if the final weight of HfO<sub>2</sub> is set as 100%. The contribution of one ligand molecule to the weight is calculated as (177.5%-100%)/6 ≈ 12.92%.

Meanwhile, the experimental dehydrated chemical formula with modulators can be noted as Hf<sub>6</sub>O<sub>6+x-y-z</sub>(BDC-NH<sub>2</sub>)<sub>6-x</sub>(CH<sub>3</sub>COO)<sub>2y</sub>(HCOO)<sub>2z</sub>, where x, 2y, and 2z is the deficiency of BDC-NH<sub>2</sub><sup>2-</sup>, the incorporated AA<sup>-</sup>, and the incorporated FA<sup>-</sup>, respectively.

Take Hf/70 AA for example, its normalized weight at 300 °C is 161.80% from the TGA result, so we can obtain this equation: 6-x = (161.80%-100%)/12.92% ≈ 4.78 and x is 1.22. It is also acquired that the AA<sup>-</sup>/BDC-NH<sub>2</sub><sup>2-</sup> and FA<sup>-</sup>/BDC-NH<sub>2</sub><sup>2-</sup> ratio from NMR peak area is 0.11 and 0.06, then 2y = 4.78 × 0.11 ≈ 0.53 and 2z = 4.78 × 0.06 ≈ 0.29. Finally, the dehydrated chemical formula of Hf/70 AA is Hf<sub>6</sub>O<sub>6.81</sub>(BDC-NH<sub>2</sub>)<sub>4.78</sub>(CH<sub>3</sub>COO)<sub>0.53</sub>(HCOO)<sub>0.29</sub>.

Similarly, the normalized weight of Zr<sub>6</sub>O<sub>6</sub>(BDC-NH<sub>2</sub>)<sub>6</sub> can be calculated as 232.4% and one ligand contribution is 22.07%, consistent with the reported work<sup>2</sup>. And its experimental dehydrated chemical formula with modulators can be noted as Zr<sub>6</sub>O<sub>6+x-y-z</sub>(BDC-NH<sub>2</sub>)<sub>6-x</sub>(CH<sub>3</sub>COO)<sub>2y</sub>(HCOO)<sub>2z</sub>.

The calculated dehydrated chemical formulas of all samples are listed in **Table 1**.

## 2. Supplementary Figures

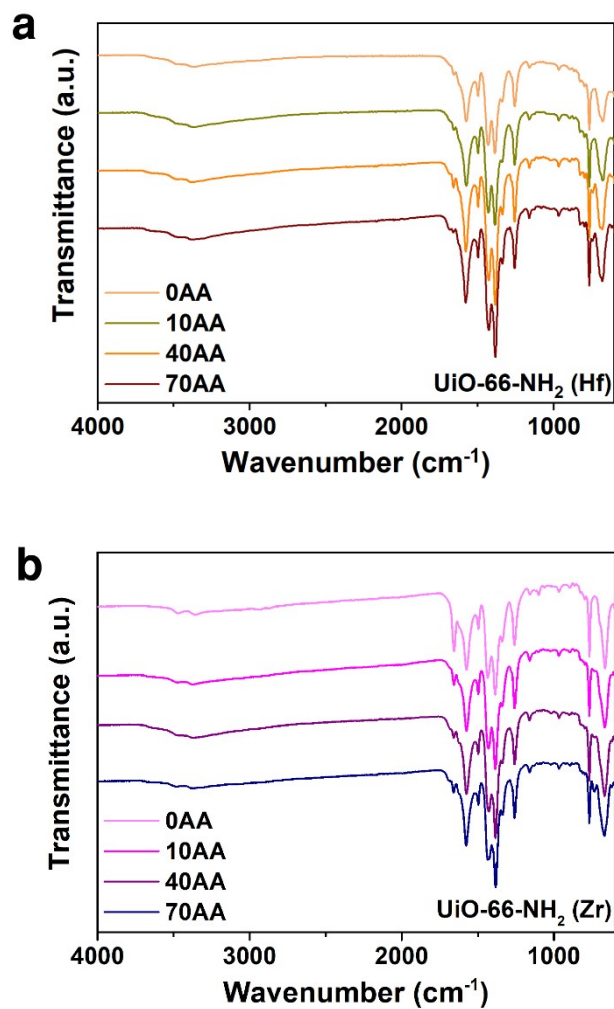

**Figure S1.** FTIR spectra of (a) UiO-66-NH<sub>2</sub> (Hf) and (b) UiO-66-NH<sub>2</sub> (Zr) with different amount of added AA.

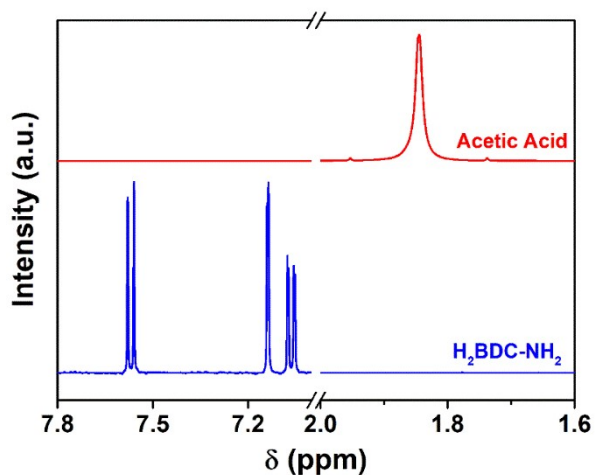

**Figure S2.** NMR of pure AA and H<sub>2</sub>BDC-NH<sub>2</sub> in 1M NaOH D<sub>2</sub>O.

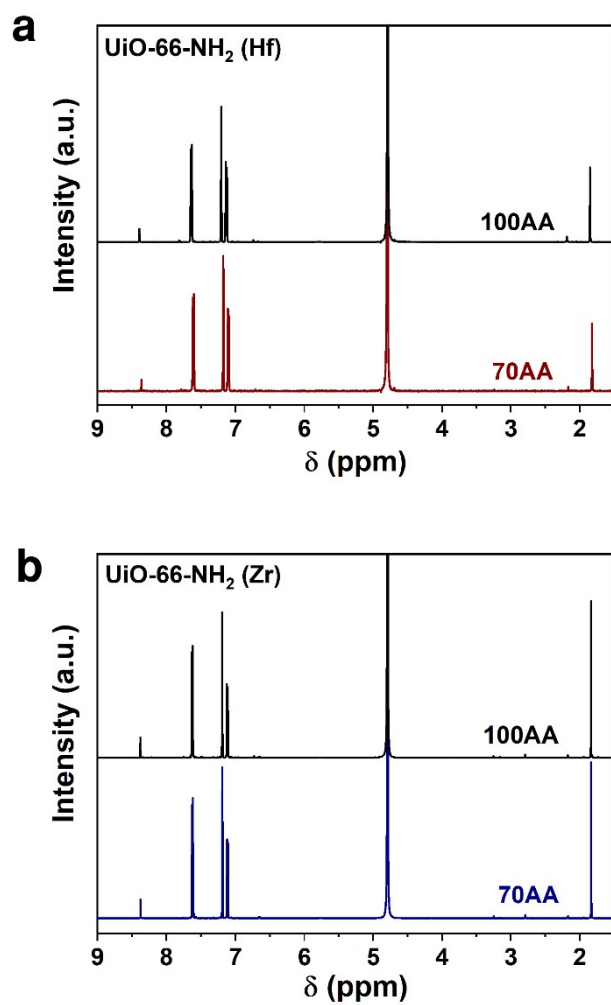

**Figure S3.** NMR spectra of (a) UiO-66-NH<sub>2</sub> (Hf) and (b) UiO-66-NH<sub>2</sub> (Zr) with 70 AA and 100 AA.

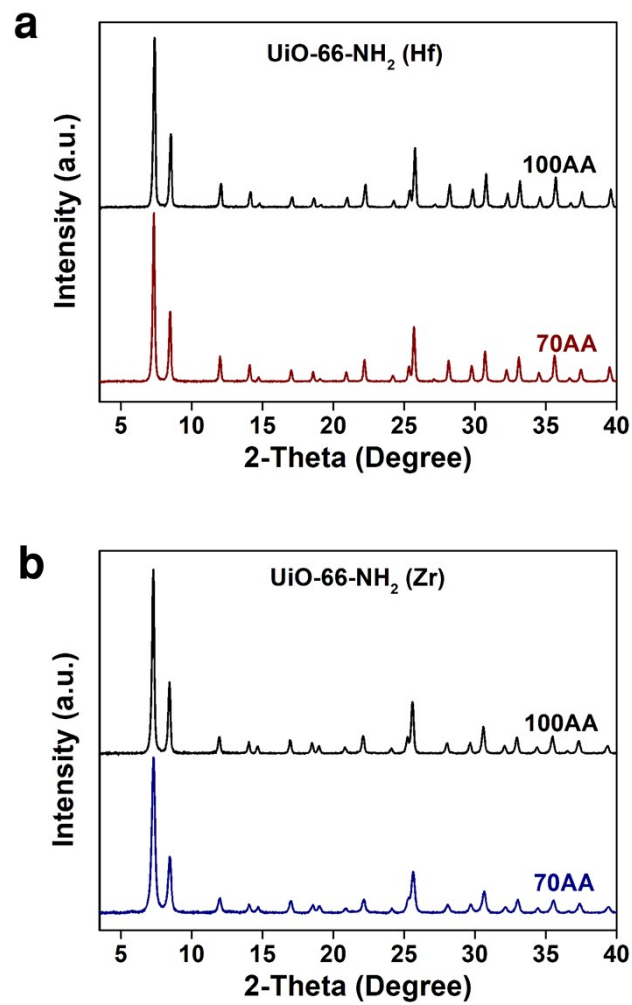

**Figure S4.** XRD patterns of (a) UiO-66-NH<sub>2</sub> (Hf) and (b) UiO-66-NH<sub>2</sub> (Zr) with 70 AA and 100 AA.

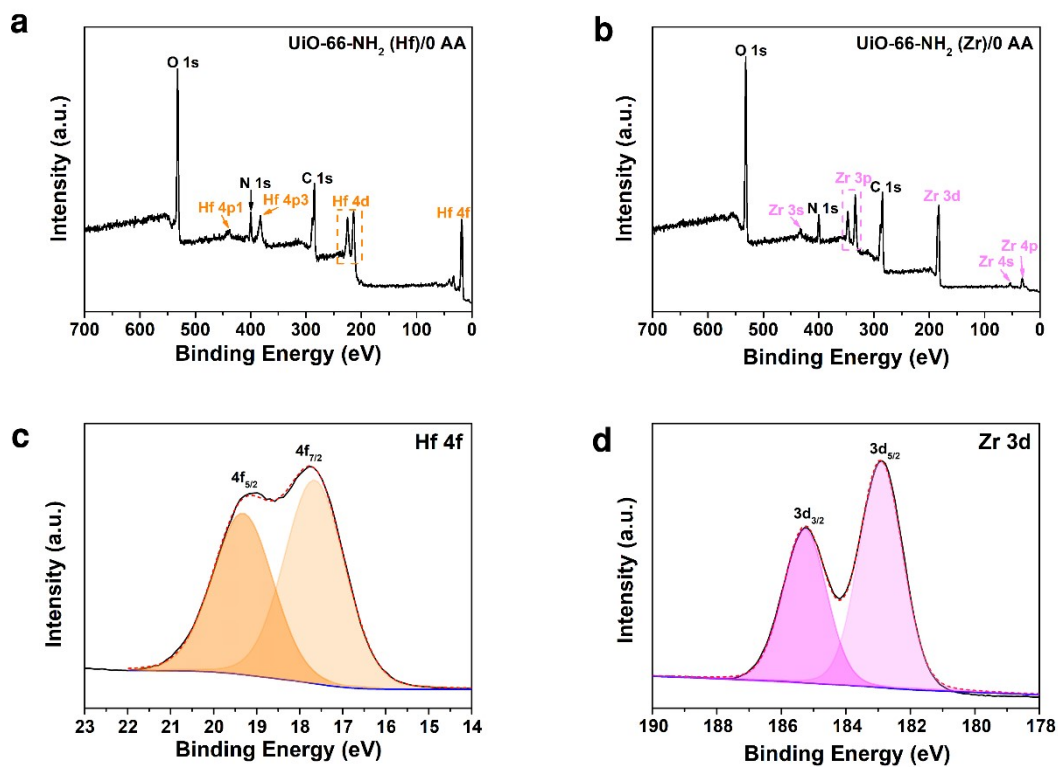

**Figure S5.** XPS survey spectra of (a) Hf/0 AA and (b) Zr/0 AA. (c) Hf 4f XPS peak of Hf/0 AA. (d) Zr 3d XPS peak of Zr/0 AA.

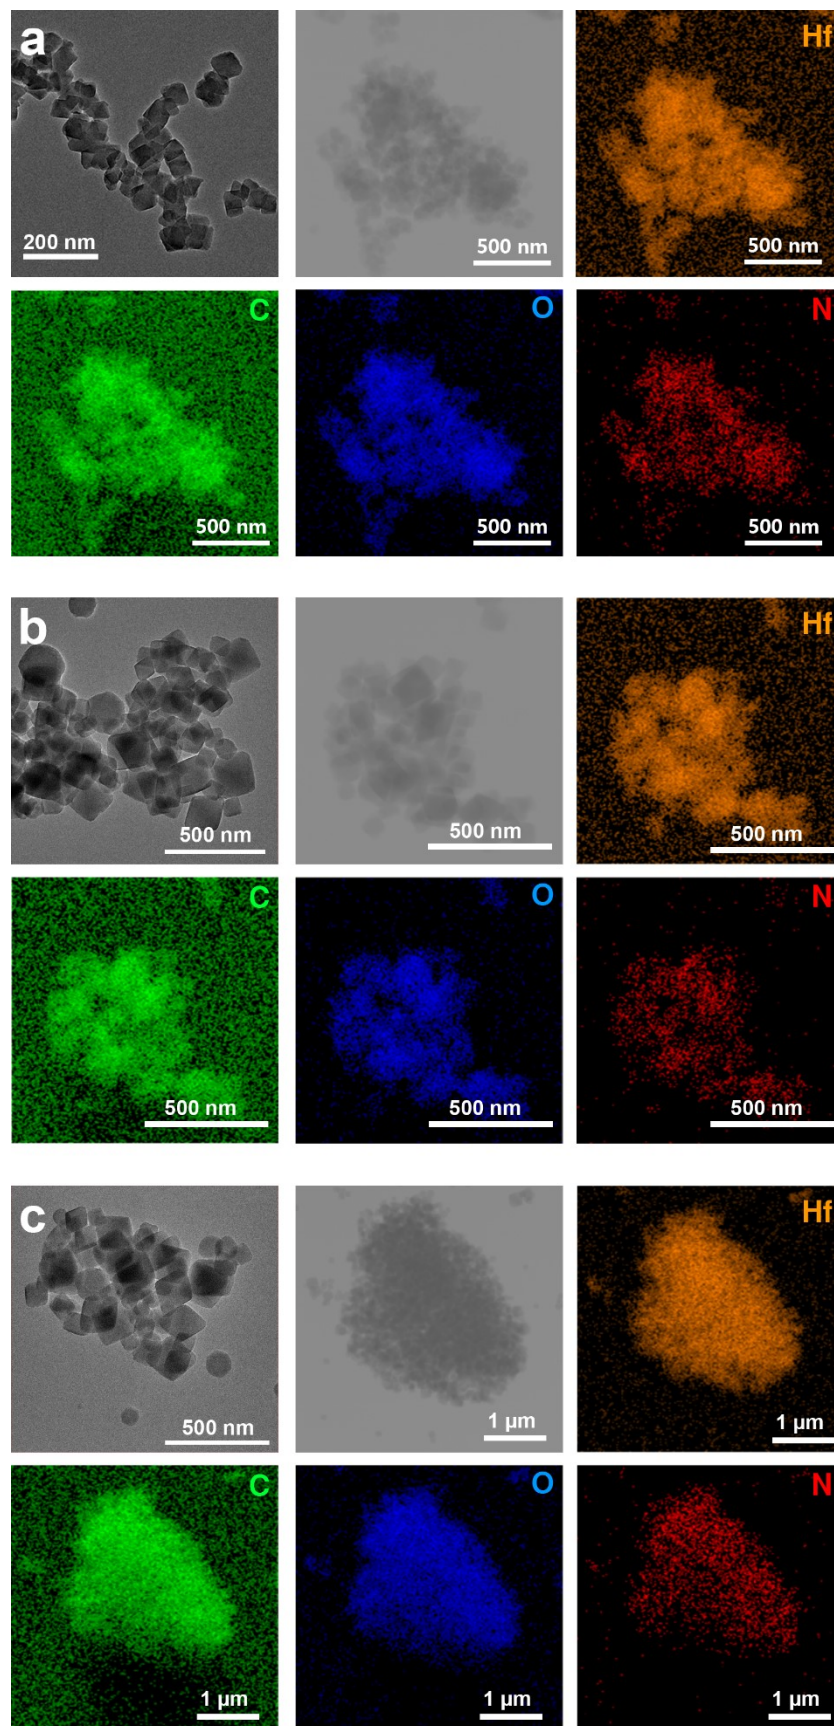

**Figure S6.** TEM and dark field images as well as the corresponding EDS elements mapping of (a) Hf/0 AA, (b) Hf/10 AA, and (c) Hf/40 AA.

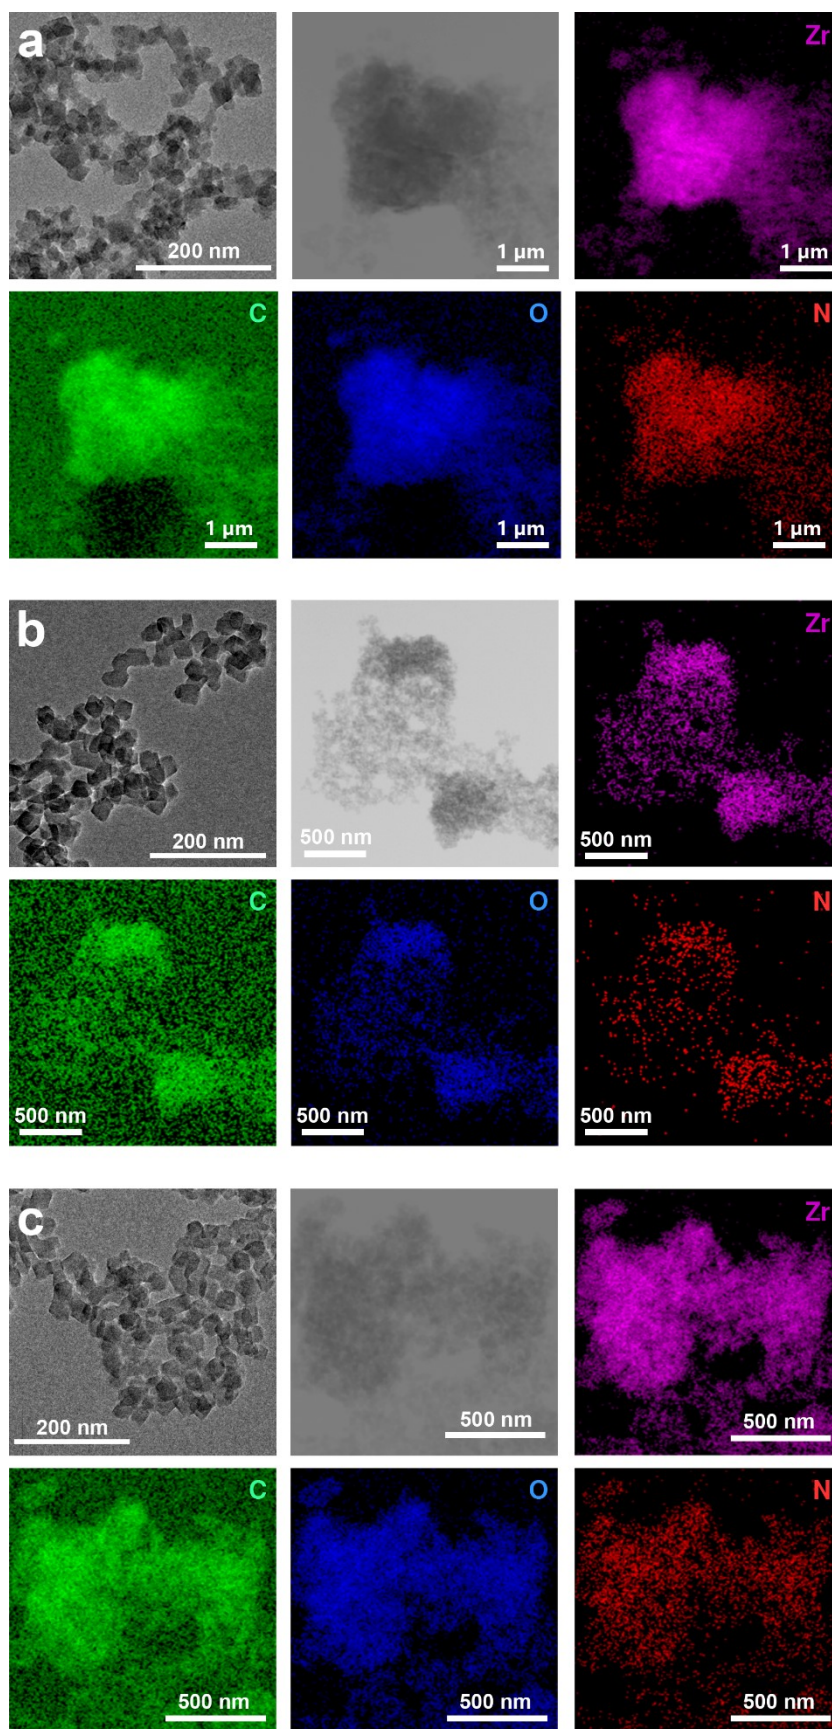

**Figure S7.** TEM and dark field images as well as the corresponding EDS elements mapping of (a) Zr/0 AA, (b) Zr/10 AA, and (c) Zr/40 AA.



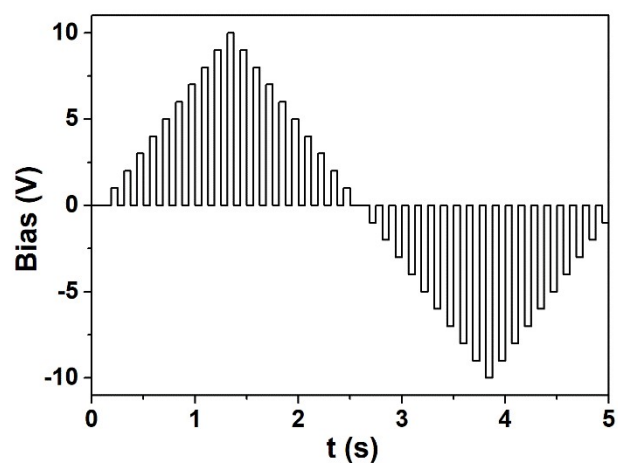

**Figure S8.** PFM bias waveform.

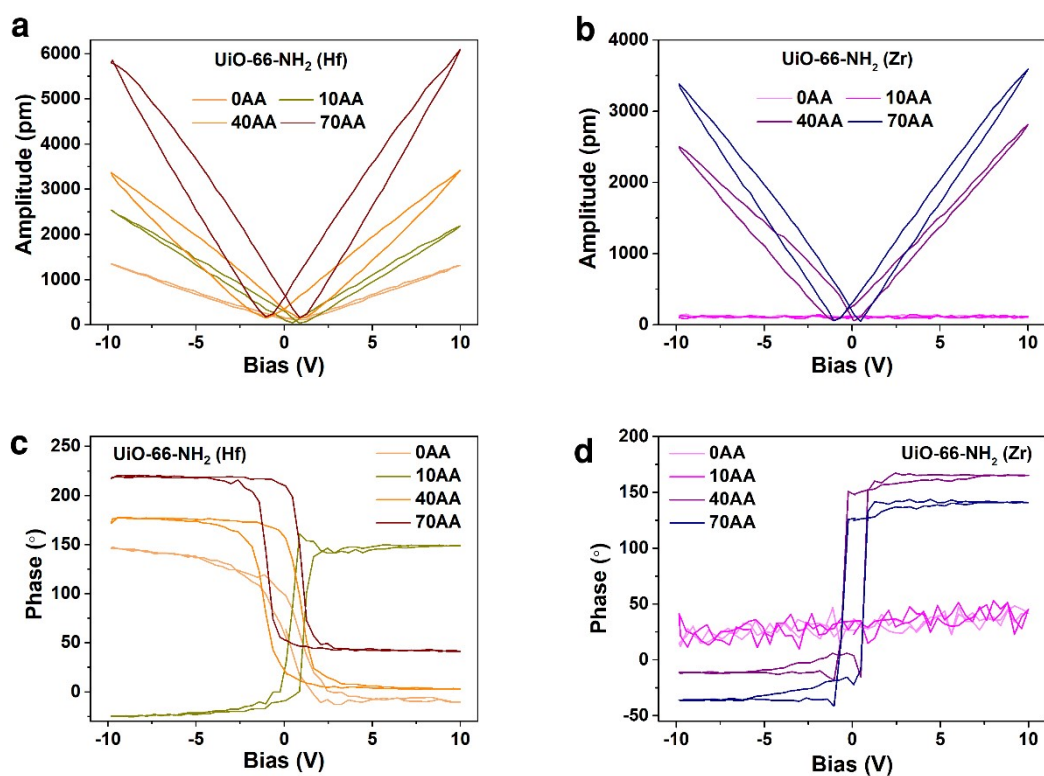

**Figure S9.** PFM bias-on state amplitude curves of (a) UiO-66-NH<sub>2</sub> (Hf) and (b) UiO-66-NH<sub>2</sub> (Zr) with different amount of added AA and (c-d) their corresponding PFM phase curves.

### 3. Supplementary Tables

**Table S1.** Crystallinity of UiO-66-NH<sub>2</sub> (Hf, Zr) with Different Amount of Added AA.

|                   | UiO-66-NH <sub>2</sub> (Hf) |       |       |      | UiO-66-NH <sub>2</sub> (Zr) |       |       |      |
|-------------------|-----------------------------|-------|-------|------|-----------------------------|-------|-------|------|
|                   | 0 AA                        | 10 AA | 40 AA | 70AA | 0 AA                        | 10 AA | 40 AA | 70AA |
| Crystallinity (%) | 72.5                        | 78.4  | 80.3  | 79.1 | 73.9                        | 80.1  | 79.9  | 81.6 |

**Table S2.** Relative AA<sup>-</sup>/BDC-NH<sub>2</sub><sup>2-</sup> and FA<sup>-</sup>/BDC-NH<sub>2</sub><sup>2-</sup> Ratio of UiO-66-NH<sub>2</sub> (Hf, Zr) with Different Amount of Added AA from NMR Peak Area.

| Amount Ratio                                       | UiO-66-NH <sub>2</sub> (Hf) |       |       |      | UiO-66-NH <sub>2</sub> (Zr) |       |       |      |
|----------------------------------------------------|-----------------------------|-------|-------|------|-----------------------------|-------|-------|------|
|                                                    | 0 AA                        | 10 AA | 40 AA | 70AA | 0 AA                        | 10 AA | 40 AA | 70AA |
| AA <sup>-</sup> /BDC-NH <sub>2</sub> <sup>2-</sup> | 0                           | 0.05  | 0.09  | 0.11 | 0                           | 0.08  | 0.14  | 0.18 |
| FA <sup>-</sup> /BDC-NH <sub>2</sub> <sup>2-</sup> | 0.04                        | 0.04  | 0.05  | 0.06 | 0.04                        | 0.05  | 0.05  | 0.07 |

**Table S3.** Atomic Percentage of (Hf, Zr)/70 AA.

| Atomic Percentage (%)       | Hf   | Zr  | C     | N    | O     |
|-----------------------------|------|-----|-------|------|-------|
| UiO-66-NH <sub>2</sub> (Hf) | 5.41 | /   | 51.88 | 8.22 | 34.49 |
| UiO-66-NH <sub>2</sub> (Zr) | /    | 7.5 | 52.15 | 6.38 | 33.96 |

**Table S4.** BET Surface Area, Micropore Volume, and Median Pore Width of UiO-66-NH<sub>2</sub> (Hf, Zr) with Different Amount of Added AA.

|                                      | UiO-66-NH <sub>2</sub> (Hf) |        |        |        | UiO-66-NH <sub>2</sub> (Zr) |        |        |          |
|--------------------------------------|-----------------------------|--------|--------|--------|-----------------------------|--------|--------|----------|
|                                      | 0 AA                        | 10 AA  | 40 AA  | 70AA   | 0 AA                        | 10 AA  | 40 AA  | 70AA     |
| S <sub>BET</sub> (m <sup>2</sup> /g) | 437.68                      | 564.03 | 739.25 | 830.72 | 667.98                      | 859.32 | 932.26 | 1,042.52 |
| V <sub>p</sub> (cm <sup>3</sup> /g)  | 0.1674                      | 0.2244 | 0.3036 | 0.336  | 0.2668                      | 0.3401 | 0.3645 | 0.4188   |
| W <sub>p</sub> (Å)                   | 7.23                        | 7.03   | 7.07   | 7.53   | 7.08                        | 7.26   | 7.30   | 7.40     |

## References

1. G. C. Shearer, S. Chavan, S. Bordiga, S. Svelle, U. Olsbye and K. P. Lillerud, *Chem. Mat.*, 2016, **28**, 3749-3761.
2. G. Fang, J. N. Hu, L. C. Tian, J. X. Liang, J. Lin, L. Li, C. Zhu and X. Wang, *Angew. Chem. Int. Ed.*, 2022, **61**, e202205077.
